# Supplementary material for: Students as Partners in Pharmacy Education: SuppleMentors as a Pilot Project of Co- Creating a Digital Learning Platform on Dietary Supplements
Source: Research Square preprint supplement (doi:10.21203/rs.3.rs-6726566/v1), 2025-06-26
Supplement: Supplementary file 1 [file 47116cab1fe1256e9d13fe9b.pdf]

# Pre-Questionnaire

---

## **Online Survey on Establishment of Online Learning Activity in Engaging BPharm Students as Partners Dietary Supplements in Dietary Supplements**

You are invited to participate in a research study conducted by the Department of Pharmacology and Pharmacy of the University of Hong Kong. The purpose of the study is to investigate the learning effectiveness by engaging Bachelor of Pharmacy students as partners in creating an E-learning platform. You will be invited to fill out the online survey to give your opinion on teaching and learning experience of the E-learning platform. The survey would only take you about 10 minutes to complete, and you can choose to terminate the survey at any time without negative consequences. I would like to stress that all information collected will remain strictly confidential. Individual details will not be disclosed or identifiable from this survey. All data containing personal identifiers be kept for 4 years after publication of first paper. If you have any questions about the research, please feel free to contact Mr. Marco T. Lee (3910 3758). If you have questions about your rights as a research participant, please contact the Human Research Ethics Committee, HKU (2241-5267) (HREC Reference Number: EA230546)

I understand the procedures described above and agree to participate in this study

☐ Yes

☐ No

---

Please type in your full name

---

Please type in your HKU UID

---

Please indicate your BPharm cohort.

☐ P27

☐ P26

☐ P25

☐ P24

-----

Please rank your agreement with the following statements on a scale of 1 to 5. Answer all questions.

---

The current level of my knowledge in supplements is:

- ☐ 1 (Very Low)
  - ☐ 2 (Low)
  - ☐ 3 (Neutral)
  - ☐ 4 (High)
  - ☐ 5 (Very High)
- 

I believe that online learning tools can enhance my understanding in supplements.

- ☐ 1 (Strongly Disagree)
  - ☐ 2 (Disagree)
  - ☐ 3 (Neutral)
  - ☐ 4 (Agree)
  - ☐ 5 (Strongly Agree)
-

I enjoy learning with online learning tools.

- ☐ 1 (Strongly Disagree)
  - ☐ 2 (Disagree)
  - ☐ 3 (Neutral)
  - ☐ 4 (Agree)
  - ☐ 5 (Strongly Agree)
- 

I think the learning model used in this tool can be applied to other topics or subjects.

- ☐ 1 (Not at all)
  - ☐ 2 (A little)
  - ☐ 3 (Moderately)
  - ☐ 4 (Quite a bit)
  - ☐ 5 (Extensively)
- 

I believe that this educational tool will be useful in my learning journey.

- ☐ 1 (Strongly Disagree)
- ☐ 2 (Disagree)
- ☐ 3 (Neutral)
- ☐ 4 (Agree)
- ☐ 5 (Strongly Agree)

END

# Post-Questionnaire

**Online Survey on Establishment of Online Learning Activity in Engaging BPharm Students as Partners Dietary Supplements in Dietary Supplements**

---

Please type in your full name

---

Please type in your HKU UID

---

Please indicate your BPharm Cohort

☐ P27

☐ P26

☐ P25

☐ P24

Please rank your agreement with the following statements on a scale of 1 to 5.

---

My knowledge in the subject matter has improved.

- ☐ 1 (Strongly Disagree)
  - ☐ 2 (Disagree)
  - ☐ 3 (Neutral)
  - ☐ 4 (Agree)
  - ☐ 5 (Strongly Agree)
- 

I feel more comfortable using e-learning tools after using this platform.

- ☐ 1 (Strongly Disagree)
  - ☐ 2 (Disagree)
  - ☐ 3 (Neutral)
  - ☐ 4 (Agree)
  - ☐ 5 (Strongly Agree)
-

I can see how the learning model used in this tool can be applied to other topics or subjects.

- ☐ 1 (Strongly Disagree)
  - ☐ 2 (Disagree)
  - ☐ 3 (Neutral)
  - ☐ 4 (Agree)
  - ☐ 5 (Strongly Agree)
- 

This educational tool was instrumental in addressing gaps in my understanding.

- ☐ 1 (Strongly Disagree)
  - ☐ 2 (Disagree)
  - ☐ 3 (Neutral)
  - ☐ 4 (Agree)
  - ☐ 5 (Strongly Agree)
- 

Overall, I found this online teaching and learning tool valuable for my learning experience.

- ☐ 1 (Strongly Disagree)
- ☐ 2 (Disagree)
- ☐ 3 (Neutral)
- ☐ 4 (Agree)
- ☐ 5 (Strongly Agree)

END
